# Supplementary material for: New product from old reaction: uniform magnetite nanoparticles from iron-mediated synthesis of alkali iodides and their protection from leaching in acidic media
Source: Royal Society of Chemistry journal article supplement (doi:10.1039/c4ra02217c), 2014-01-01
Supplement: c4ra02217c1.pdf [file c4ra02217c1.pdf]

## Supplementary Materials

### New product from old reaction: uniform magnetite nanoparticles from iron-mediated synthesis of alkali iodides and their protection from leaching in acidic media

R. P. Pogorilyi,<sup>a</sup> I. V. Melnyk,<sup>a</sup> Y. L. Zub,<sup>a</sup> S. Carlson,<sup>b</sup> G. Daniel,<sup>c</sup> P. Svedlindh,<sup>d</sup> G. A. Seisenbaeva<sup>e</sup>, V. G. Kessler<sup>e</sup>

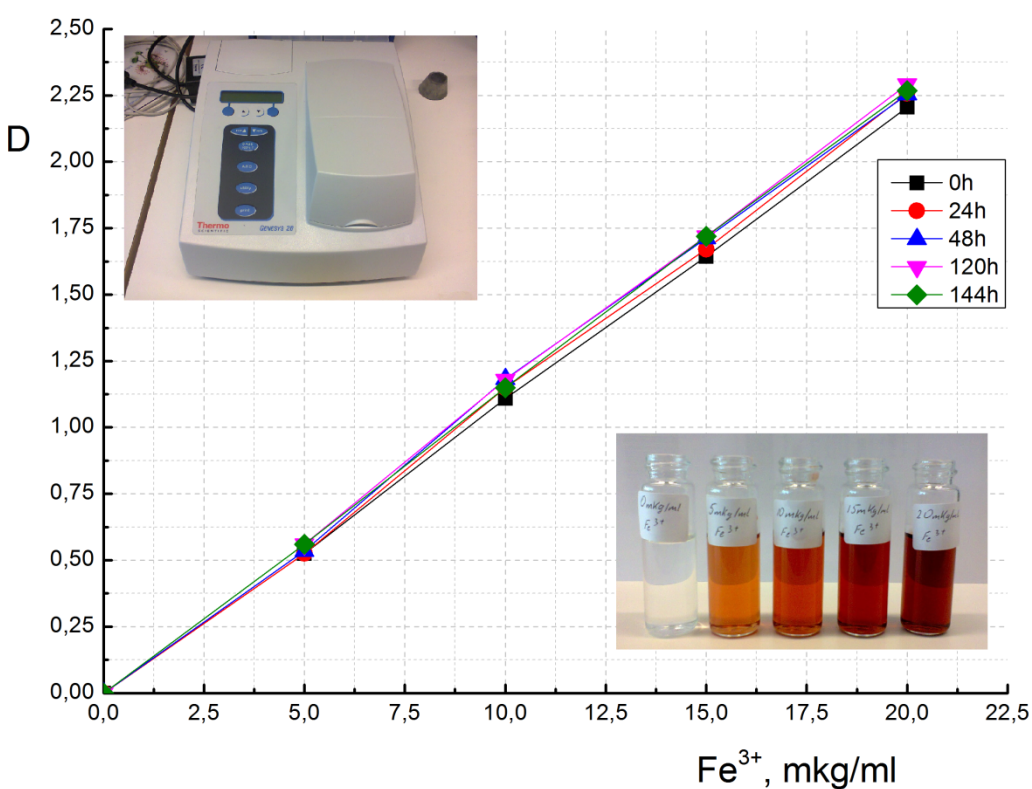

**Figure FS1.** Calibration curve for determination of iron (III) concentration and evaluation of its stability in time.

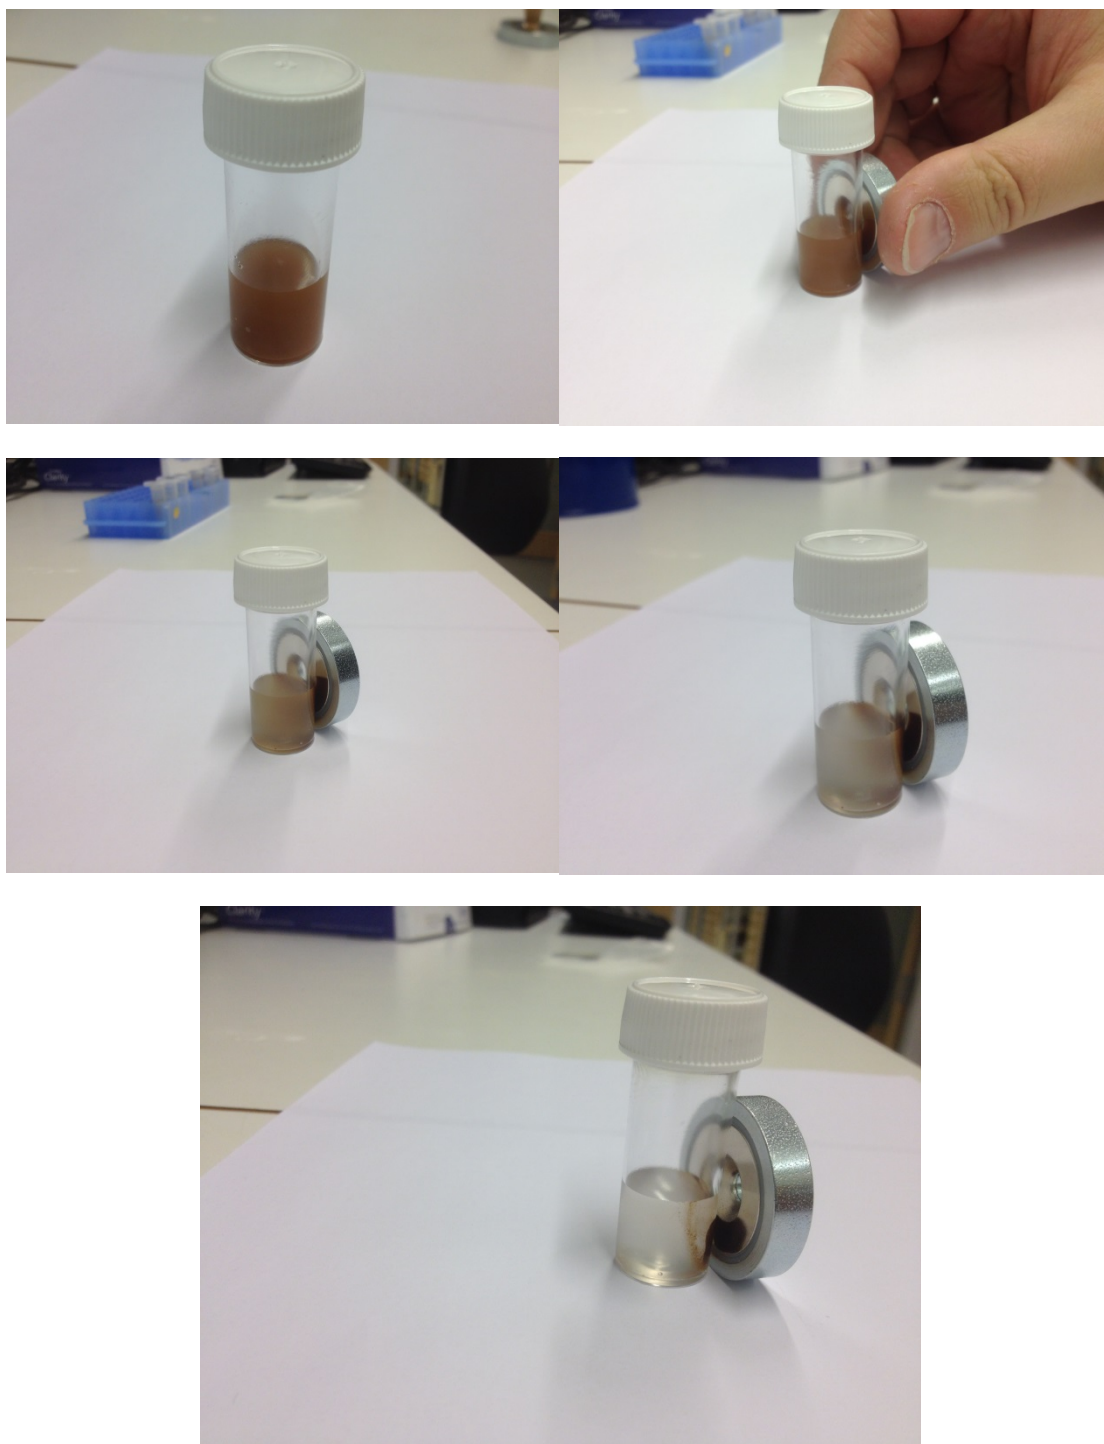

**Figure FS2.** Magnetic extraction of the  $\text{Fe}_3\text{O}_4:\text{SiO}_2 = 1:20$  nanoparticles. Two images above are for the initial dispersion, the images that follow are taken each 10 s. Total time until obtaining visually clean solution is 30 s.
